# Supplementary material
Source: publisher figshare collection journal article supplement (https://tandf.figshare.com/articles/dataset/_/4185060)
Supplement: Supplementary file 1 [file 1]

**Table S1** Electric conductivity values of the manure compost pellets (MCP) and nitrogen-enriched manure compost pellets (N+MCP) in each pH treatment 1 day after the incubation began.

| pH<br>treatment | pH<br>5.3            | pH<br>6.0 | pH<br>7.0 | pH<br>8.0 | pH<br>8.6 |
|-----------------|----------------------|-----------|-----------|-----------|-----------|
|                 | (S m <sup>-1</sup> ) |           |           |           |           |
| MCP             | 0.867                | 0.753     | 0.607     | 0.518     | 0.482     |
| N+MCP           | 0.915                | 0.910     | 0.923     | 0.916     | 0.921     |
