# Supplementary material
Source: publisher figshare collection journal article supplement (https://tandf.figshare.com/articles/dataset/_/4185060)
Supplement: Supplementary file 2 [file 1]

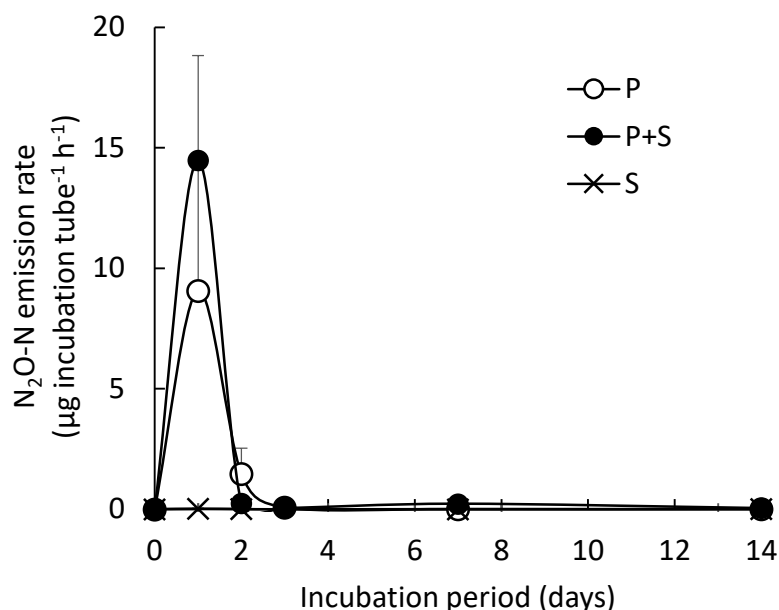

**Figure S1** Nitrous oxide ( $\text{N}_2\text{O-N}$ ) emission rates in the treatments of soil alone (S), manure compost pellets alone (P) and soil mixed with manure compost pellets (P+S) in the preliminary incubation experiment. Headspace volume of the cylindrical incubation tube was  $434 \text{ cm}^3$  (inner diameter, 6.4 cm; height, 13.5 cm). For the S treatment, 30 g of soil on a dry matter basis was placed in a beaker. For the P treatment, 8 fresh pellets (1.4 g) were placed in a beaker. For the P+S treatment, 15 g of soil on a dry matter basis was placed on the bottom of a beaker and 8 fresh pellets (1.4 g) were placed on the soil and then covered with an additional 15 g of soil. In the S and P+S treatments, soil water content was adjusted to  $0.50 \text{ g g}^{-1}$ . In the P treatment, distilled water was supplied at 0.7 volumes to the fresh weight of pellets (final water content,  $0.88 \text{ g g}^{-1}$ ). The beakers were covered with aluminum foil and incubated at  $30^\circ \text{ C}$ . When measuring  $\text{N}_2\text{O}$  emission, each beaker was enclosed within the incubation tube for 1h at  $30^\circ \text{ C}$ . Cumulative  $\text{N}_2\text{O-N}$  emission rates over the 14-day incubation period were  $1.4 \text{ µg}$  in the S treatment,  $259.4 \text{ µg}$  in the P treatment and  $391.0 \text{ µg}$  in the P+S treatment. The incubation experiment was conducted in duplicate for each treatment. Error bars indicate standard deviations.
