# Supplementary material
Source: publisher figshare collection journal article supplement (https://tandf.figshare.com/articles/dataset/_/4185060)
Supplement: Supplementary file 3 [file 1]

Archive with 2 entries (2 files):
- tssp_a_1239510_sm8009.pdf
- tssp_a_1239510_sm7521.pdf
